# Supplementary material
Source: PubMed Central journal article supplement (PMC6205748)
Supplement: NIHMS1503409-supplement-Change_of_Authorship_form.pdf [file NIHMS1503409-supplement-Change_of_Authorship_form.pdf]

## Change of Authorship Form

(Must be completed and signed by ALL authors)

Please check all that apply

New author(s) have been added (in addition to this form, all new authors must complete the copyright transfer agreement and conflict of interest disclosure.

Change in order of authorship.

An author wishes to remove his/her name. An author's name may only be removed his/her own request and a letter signed by the author should accompany this form

Manuscript Number STROKE/2018/022330DR1

Manuscript Title Focal Cerebral Ischemia and Reperfusion Induce Brain Injury through  $\alpha 2\delta$ -1-Bound NMDA Receptors

### Former Authorship

Please list ALL AUTHORS in the same order as the original submission. For more than 12, use an extra sheet.

#### Print Name

Name (1) Yi Luo  
Name (2) Huijie Ma  
Name (3) Jing-Jing Zhou  
Name (4) Lingyong Li  
Name (5) Shao-Rui Chen  
Name (6) Lin Chen

#### Print Name

Name (7) Hui-Lin Pan  
Name (8) \_\_\_\_\_  
Name (9) \_\_\_\_\_  
Name (10) \_\_\_\_\_  
Name (11) \_\_\_\_\_  
Name (12) \_\_\_\_\_

### New Authorship

All authors must sign below agreeing to the changes in authorship. The authorship order must reflect the authorship order of the manuscript.

|                                |                                 |                      |
|--------------------------------|---------------------------------|----------------------|
| Name (1) <u>Yi Luo</u>         | Signature <u>Yi Luo</u>         | Date <u>8/8/2018</u> |
| Name (2) <u>Huijie Ma</u>      | Signature <u>Huijie Ma</u>      | Date <u>8/8/2018</u> |
| Name (3) <u>Jing-Jing Zhou</u> | Signature <u>Jing-Jing Zhou</u> | Date <u>8/8/2018</u> |
| Name (4) <u>Lingyong Li</u>    | Signature <u>Lingyong Li</u>    | Date <u>8/8/18</u>   |
| Name (5) <u>Shao-Rui Chen</u>  | Signature <u>Shao-Rui Chen</u>  | Date <u>8/8/18</u>   |
| Name (6) <u>Jixiang Zhang</u>  | Signature <u>Jixiang Zhang</u>  | Date <u>8/8/18</u>   |
| Name (7) <u>Lin Chen</u>       | Signature <u>Lin Chen</u>       | Date <u>8/8/18</u>   |
| Name (8) <u>Hui-Lin Pan</u>    | Signature <u>Hui-Lin Pan</u>    | Date <u>8/8/18</u>   |
| Name (9) _____                 | Signature _____                 | Date _____           |
| Name (10) _____                | Signature _____                 | Date _____           |
| Name (11) _____                | Signature _____                 | Date _____           |
| Name (12) _____                | Signature _____                 | Date _____           |

Please scan and email to [stroke@strokeahajournal.org](mailto:stroke@strokeahajournal.org).
